# Supplementary material for: A novel association between relaxin receptor polymorphism and hematopoietic stem cell yield after mobilization
Source: PLoS One. 2017 Jun 30;12(6):e0179986. doi: 10.1371/journal.pone.0179986 (PMC5493337; doi:10.1371/journal.pone.0179986)
Supplement: S1 File — Association of 53 polymorphisms with mobilization outcomes. (XLSX) [file pone.0179986.s001.xlsx]

## Sheet: Table A
Table A. Association of 53 polymorphisms with mobilization outcomesa
Polymorphism			CD34+ cells/μL in PB				CD34+ cells/kg (×106)				CD34+ cells/μL in a product
			n	Mean ± SD	Raw P	FDR P	n	Mean ± SD	Raw P	FDR P	n	Mean ± SD	Raw P	FDR P
Genotype
	rs17609240
		GG	77	3.73 ± 1.19	0.975	0.975	60	1.66 ± 0.92	0.945	0.97	60	7.25 ± 1.37	0.99	0.99
		TG	60	3.69 ± 1.27			53	1.61 ± 0.94			53	7.25 ± 1.43
		TT	11	3.66 ± 1.42			9	1.69 ± 1.25			9	7.18 ± 1.84
	rs9131
		CC	48	3.56 ± 1.36	0.396	0.807848	40	1.53 ± 1.03	0.324	0.97	40	7.01 ± 1.61	0.151	0.923083
		CT	83	3.73 ± 1.16			69	1.63 ± 0.89			69	7.25 ± 1.31
		TT	17	4.04 ± 1.17			13	1.98 ± 0.92			13	7.89 ± 1.22
	rs16850408
		CC	46	3.78 ± 1.15	0.225	0.807848	34	1.73 ± 0.91	0.434	0.97	34	7.38 ± 1.26	0.412	0.923083
		CA	80	3.57 ± 1.32			70	1.54 ± 0.94			70	7.10 ± 1.48
		AA	22	4.06 ± 0.97			18	1.82 ± 1.04			18	7.53 ± 1.43
	rs7686861
		CC	53	3.56 ± 1.30	0.442	0.807848	44	1.51 ± 0.99	0.481	0.97	44	7.04 ± 1.54	0.348	0.923083
		CT	77	3.75 ± 1.22			65	1.68 ± 0.95			65	7.29 ± 1.39
		TT	18	3.96 ± 1.02			13	1.84 ± 0.76			13	7.66 ± 1.03
	rs1371799
		TT	49	3.55 ± 1.34	0.214	0.807848	41	1.52 ± 1.02	0.271	0.97	41	7.03 ± 1.59	0.172	0.923083
		CT	81	3.71 ± 1.15			67	1.62 ± 0.89			67	7.24 ± 1.32
		CC	18	4.15 ± 1.22			14	2.00 ± 0.95			14	7.86 ± 1.23
	rs4065321
		CC	59	3.60 ± 1.51	0.4	0.807848	52	1.67 ± 1.10	0.846	0.97	52	7.15 ± 1.68	0.453	0.923083
		CT	59	3.69 ± 1.10			47	1.57 ± 0.83			47	7.17 ± 1.20
		TT	30	3.97 ± 0.79			23	1.68 ± 0.82			23	7.58 ± 1.14
	rs445
		CC	71	3.58 ± 1.33	0.479	0.807848	63	1.60 ± 0.97	0.912	0.97	63	7.17 ± 1.51	0.855	0.944063
		CT	46	3.84 ± 1.03			32	1.67 ± 0.92			32	7.31 ± 1.24
		TT	31	3.81 ± 1.27			27	1.68 ± 0.94			27	7.32 ± 1.41
	rs4895441
		AA	52	3.81 ± 1.32	0.543	0.822216	46	1.73 ± 1.01	0.355	0.97	46	7.41 ± 1.42	0.396	0.923083
		GA	71	3.73 ± 1.25			58	1.65 ± 0.96			58	7.21 ± 1.49
		GG	25	3.48 ± 0.99			18	1.35 ± 0.67			18	6.88 ± 1.10
	rs4794822
		CC	43	3.92 ± 0.85	0.293	0.807848	34	1.71 ± 0.76	0.863	0.97	34	7.52 ± 1.10	0.348	0.923083
		CT	64	3.71 ± 1.26			52	1.63 ± 0.99			52	7.21 ± 1.36
		TT	41	3.50 ± 1.50			36	1.59 ± 1.07			36	7.03 ± 1.73
	rs2072910
		TT	68	3.64 ± 1.27	0.797	0.916458	55	1.57 ± 0.94	0.707	0.97	55	7.12 ± 1.44	0.603	0.923083
		CT	69	3.77 ± 1.28			57	1.71 ± 1.01			57	7.31 ± 1.49
		CC	11	3.80 ± 0.59			10	1.61 ± 0.56			10	7.56 ± 0.82
	rs1801157
		CC	74	3.67 ± 1.37	0.717	0.884977	61	1.66 ± 1.05	0.967	0.97	61	7.24 ± 1.56	0.81	0.941326
		CT	59	3.81 ± 1.04			46	1.61 ± 0.82			46	7.31 ± 1.21
		TT	15	3.57 ± 1.26			15	1.62 ± 0.93			15	7.04 ± 1.48
	rs3894194
		AA	43	3.72 ± 1.24	0.816	0.916458	36	1.63 ± 0.93	0.722	0.97	36	7.29 ± 1.40	0.817	0.941326
		GA	80	3.67 ± 1.21			67	1.59 ± 0.89			67	7.17 ± 1.39
		GG	25	3.85 ± 1.33			19	1.79 ± 1.16			19	7.39 ± 1.63
	rs3859192
		TT	48	3.61 ± 1.44	0.473	0.807848	41	1.63 ± 1.04	0.68	0.97	41	7.18 ± 1.70	0.338	0.923083
		CT	64	3.67 ± 1.25			50	1.57 ± 0.98			50	7.10 ± 1.34
		CC	36	3.93 ± 0.85			31	1.76 ± 0.76			31	7.56 ± 1.11
	rs12075
		GG	127	3.72 ± 1.23	0.176	0.807848	104	1.64 ± 0.94	0.16	0.97	104	7.26 ± 1.43	0.25	0.923083
		GA	19	3.50 ± 1.22			16	1.42 ± 0.92			16	6.94 ± 1.30
		AA	2	5.20 ± 1.53			2	2.77 ± 1.37			2	8.69 ± 1.83
	rs5020946
		GG	66	3.88 ± 1.23	0.112	0.807848	56	1.79 ± 1.02	0.138	0.97	56	7.46 ± 1.43	0.72	0.941326
		GT	35	3.35 ± 1.19			29	1.35 ± 0.70			29	6.73 ± 1.31
		TT	47	3.75 ± 1.24			37	1.64 ± 0.97			37	7.32 ± 1.43
	rs12660713
		GG	114	3.76 ± 1.24	0.088	0.807848	94	1.70 ± 0.96	0.159	0.97	94	7.36 ± 1.43	0.076	0.923083
		GA	33	3.62 ± 1.15			27	1.46 ± 0.85			27	6.93 ± 1.30
		AA	1	1.1 ±			1	0.2 ±			1	4.7 ±
	rs8065443
		GG	37	3.94 ± 0.89	0.367	0.807848	28	1.74 ± 0.81	0.828	0.97	28	7.51 ± 1.17	0.424	0.923083
		GA	73	3.69 ± 1.21			62	1.61 ± 0.93			62	7.23 ± 1.28
		AA	38	3.54 ± 1.53			32	1.61 ± 1.12			32	7.03 ± 1.82
	rs4657616
		AA	79	3.63 ± 1.22	0.632	0.831195	64	1.52 ± 0.98	0.377	0.97	64	7.04 ± 1.48	0.25	0.923083
		GA	53	3.77 ± 1.31			46	1.76 ± 0.92			46	7.46 ± 1.37
		GG	16	3.93 ± 1.04			12	1.79 ± 0.87			12	7.50 ± 1.20
	rs2183383
		CC	131	3.73 ± 1.24	0.758	0.913045	109	1.66 ± 0.95	0.437	0.97	109	7.28 ± 1.41	0.502	0.923083
		CT	15	3.52 ± 1.19			11	1.33 ± 0.86			11	6.82 ± 1.41
		TT	2	4.08 ± 1.47			2	2.19 ± 1.43			2	7.86 ± 2.67
	rs11121242
		GG	110	3.78 ± 1.23	0.574	0.822216	90	1.68 ± 0.96	0.66	0.97	90	7.33 ± 1.37	0.552	0.923083
		GA	36	3.55 ± 1.27			31	1.51 ± 0.94			31	7.00 ± 1.57
		AA	2	3.34 ± 0.05			1	1.36 ±			1	7.27 ±
	rs6577536
		GG	110	3.73 ± 1.25	0.944	0.975	91	1.66 ± 0.96	0.93	0.97	91	7.31 ± 1.38	0.668	0.941326
		GA	35	3.66 ± 1.24			29	1.58 ± 0.95			29	7.04 ± 1.59
		AA	3	3.61 ± 0.48			2	1.65 ± 0.40			2	7.06 ± 0.30
	rs11590606
		TT	110	3.76 ± 1.26	0.4	0.807848	91	1.68 ± 0.98	0.647	0.97	91	7.35 ± 1.41	0.781	0.941326
		CT	35	3.59 ± 1.21			29	1.49 ± 0.87			29	6.94 ± 1.49
		CC	3	3.61 ± 0.48			2	1.65 ± 0.40			2	7.06 ± 0.30
	rs10864368
		CC	110	3.75 ± 1.26	0.438	0.807848	91	1.68 ± 0.98	0.671	0.97	91	7.34 ± 1.41	0.808	0.941326
		CT	35	3.60 ± 1.20			29	1.50 ± 0.86			29	6.95 ± 1.49
		TT	3	3.61 ± 0.48			2	1.65 ± 0.40			2	7.06 ± 0.30
	rs976760
		TT	40	3.92 ± 1.26	0.364	0.807848	33	1.79 ± 0.96	0.493	0.97	33	7.48 ± 1.46	0.318	0.923083
		CT	68	3.56 ± 1.33			56	1.54 ± 1.02			56	7.06 ± 1.54
		CC	40	3.77 ± 1.01			33	1.65 ± 0.80			33	7.32 ± 1.15
	rs6936204
		CC	105	3.65 ± 1.31	0.373	0.807848	88	1.58 ± 0.95	0.545	0.97	88	7.13 ± 1.43	0.576	0.923083
		CT	30	3.80 ± 1.21			26	1.75 ± 1.07			26	7.57 ± 1.53
		TT	13	4.01 ± 0.42			8	1.88 ± 0.27			8	7.42 ± 0.58
	rs10932765
		CC	56	3.51 ± 1.36	0.503	0.807848	49	1.50 ± 0.99	0.439	0.97	49	7.08 ± 1.51	0.301	0.923083
		CT	63	3.84 ± 1.26			51	1.73 ± 1.00			51	7.29 ± 1.47
		TT	29	3.83 ± 0.85			22	1.72 ± 0.72			22	7.50 ± 1.07
	rs2163950
		CC	104	3.73 ± 1.30	0.943	0.975	86	1.66 ± 1.00	0.9	0.97	86	7.26 ± 1.51	0.942	0.99
		CA	39	3.66 ± 1.14			32	1.61 ± 0.87			32	7.18 ± 1.25
		AA	5	3.82 ± 0.51			4	1.46 ± 0.14			4	7.41 ± 0.31
	SNP28
		AA	133	3.73 ± 1.19	0.6	0.831195	109	1.63 ± 0.91	0.89	0.97	109	7.24 ± 1.33	0.973	0.99
		GA	15	3.56 ± 1.59			13	1.67 ± 1.30			13	7.26 ± 2.10
	rs2853946
		AA	117	3.69 ± 1.20	0.32	0.807848	95	1.65 ± 0.96	0.49	0.97	95	7.23 ± 1.43	0.513	0.923083
		TA	27	3.70 ± 1.42			23	1.52 ± 0.97			23	7.14 ± 1.44
		TT	4	4.42 ± 0.49			4	2.14 ± 0.46			4	8.29 ± 0.45
	rs8078723
		TT	41	3.90 ± 0.86	0.354	0.807848	32	1.69 ± 0.78	0.908	0.97	32	7.48 ± 1.12	0.437	0.923083
		CT	65	3.73 ± 1.26			54	1.65 ± 0.97			54	7.25 ± 1.35
		CC	42	3.51 ± 1.48			36	1.59 ± 1.07			36	7.03 ± 1.73
	rs7667376
		CC	53	3.57 ± 1.30	0.464	0.807848	44	1.53 ± 0.99	0.546	0.97	44	7.05 ± 1.54	0.37	0.923083
		CT	77	3.75 ± 1.23			65	1.67 ± 0.96			65	7.29 ± 1.40
		TT	18	3.97 ± 1.03			13	1.84 ± 0.76			13	7.67 ± 1.04
	rs2518564
		AA	71	3.55 ± 1.33	0.248	0.807848	59	1.52 ± 0.98	0.232	0.97	59	6.99 ± 1.50	0.104	0.923083
		GA	70	3.89 ± 1.14			58	1.79 ± 0.92			58	7.53 ± 1.32
		GG	7	3.61 ± 1.02			5	1.31 ± 0.76			5	6.97 ± 1.11
	rs2517524
		AA	67	3.64 ± 1.26	0.523	0.815265	56	1.55 ± 0.99	0.56	0.97	56	7.13 ± 1.46	0.414	0.923083
		CA	61	3.70 ± 1.23			48	1.67 ± 0.93			48	7.23 ± 1.42
		CC	20	4.00 ± 1.17			18	1.82 ± 0.88			18	7.64 ± 1.29
	rs1041163
		TT	94	3.80 ± 1.30	0.474	0.807848	79	1.72 ± 0.98	0.441	0.97	79	7.36 ± 1.51	0.461	0.923083
		CT	52	3.57 ± 1.10			41	1.49 ± 0.86			41	7.02 ± 1.21
		CC	2	3.25 ± 1.83			2	1.44 ± 0.42			2	7.07 ± 2.20
	rs13347
		CC	68	3.64 ± 1.26	0.643	0.831195	58	1.60 ± 0.88	0.622	0.97	58	7.20 ± 1.40	0.794	0.941326
		CT	65	3.82 ± 1.22			50	1.73 ± 1.01			50	7.34 ± 1.46
		TT	15	3.59 ± 1.22			14	1.48 ± 1.03			14	7.08 ± 1.42
	rs3917924
		GG	129	3.69 ± 1.26	0.613	0.831195	106	1.64 ± 0.96	0.786	0.97	106	7.23 ± 1.44	0.814	0.941326
		GA	19	3.84 ± 1.09			16	1.57 ± 0.87			16	7.32 ± 1.29
	rs546829
		AA	32	3.78 ± 1.15	0.493	0.807848	26	1.63 ± 0.99	0.684	0.97	26	7.29 ± 1.43	0.52	0.923083
		TA	77	3.60 ± 1.26			68	1.59 ± 0.94			68	7.13 ± 1.44
		TT	39	3.88 ± 1.25			28	1.77 ± 0.95			28	7.49 ± 1.37
	rs2844503
		TT	56	3.68 ± 1.17	0.971	0.975	47	1.65 ± 0.86	0.97	0.424	47	7.32 ± 1.32	0.895	0.968061
		TA	67	3.74 ± 1.21			52	1.62 ± 1.01			52	7.19 ± 1.45
		AA	25	3.72 ± 1.46			23	1.67 ± 1.01			23	7.21 ± 1.60
	rs579459
		TT	74	3.67 ± 1.26	0.718	0.884977	59	1.60 ± 0.95	0.646	0.97	59	7.26 ± 1.50	0.71	0.941326
		CT	62	3.72 ± 1.11			53	1.63 ± 0.87			53	7.17 ± 1.28
		CC	12	3.98 ± 1.70			10	1.91 ± 1.35			10	7.58 ± 1.70
	rs6702883
		AA	100	3.77 ± 1.25	0.09	0.807848	83	1.71 ± 0.98	0.056	0.97	83	7.32 ± 1.45	0.217	0.923083
		GA	43	3.47 ± 1.19			36	1.39 ± 0.81			36	6.99 ± 1.34
		GG	5	4.65 ± 0.72			3	2.56 ± 0.79			3	8.31 ± 1.35
	rs4311917
		AA	100	3.85 ± 1.16	0.068	0.807848	85	1.72 ± 0.94	0.107	0.97	85	7.39 ± 1.38	0.032	0.830333
		CA	44	3.36 ± 1.36			34	1.37 ± 0.91			34	6.77 ± 1.43
		CC	4	4.16 ± 0.99			3	2.22 ± 1.20			3	8.42 ± 1.28
	rs345275
		AA	92	3.75 ± 1.09	0.83	0.916458	73	1.58 ± 0.85	0.721	0.97	73	7.19 ± 1.23	0.696	0.941326
		TA	47	3.68 ± 1.34			42	1.72 ± 0.98			42	7.39 ± 1.48
		TT	9	3.51 ± 2.04			7	1.76 ± 1.64			7	7.01 ± 2.67
	rs2365669
		GG	75	3.74 ± 1.33	0.879	0.950755	61	1.74 ± 1.04	0.498	0.97	61	7.26 ± 1.59	0.984	0.99
		GA	57	3.72 ± 1.08			47	1.55 ± 0.81			47	7.25 ± 1.17
		AA	16	3.57 ± 1.34			14	1.50 ± 0.98			14	7.18 ± 1.52
	rs7523839
		TT	85	3.83 ± 1.12	0.409	0.807848	71	1.73 ± 0.93	0.448	0.97	71	7.35 ± 1.38	0.583	0.923083
		TG	59	3.56 ± 1.41			48	1.51 ± 0.99			48	7.10 ± 1.52
		GG	4	3.54 ± 0.54			3	1.45 ± 0.55			3	6.88 ± 0.51
	rs850610
		GG	81	3.85 ± 1.26	0.253	0.807848	65	1.70 ± 1.00	0.773	0.97	65	7.31 ± 1.44	0.853	0.944063
		GA	56	3.50 ± 1.25			47	1.57 ± 0.93			47	7.15 ± 1.46
		AA	11	3.83 ± 0.85			10	1.57 ± 0.70			10	7.27 ± 1.15
	rs10923929
		CC	130	3.67 ± 1.22	0.249	0.807848	107	1.61 ± 0.94	0.37	0.97	107	7.22 ± 1.42	0.627	0.923083
		GC	18	4.03 ± 1.32			15	1.85 ± 1.04			15	7.41 ± 1.47
	rs11240089
		TT	71	3.56 ± 1.03	0.095	0.807848	56	1.49 ± 0.77	0.101	0.97	56	6.98 ± 1.21	0.047	0.830333
		CT	59	3.74 ± 1.46			52	1.67 ± 1.05			52	7.32 ± 1.58
		CC	18	4.26 ± 1.08			14	2.09 ± 1.10			14	8.00 ± 1.35
	rs12740969
		GG	102	3.76 ± 1.24	0.278	0.807848	84	1.65 ± 0.95	0.181	0.97	84	7.21 ± 1.42	0.282	0.923083
		TG	44	3.56 ± 1.20			37	1.57 ± 0.93			37	7.27 ± 1.41
		TT	2	4.87 ± 1.90			1	3.35 ±			1	9.48 ±
	rs11264422
		TT	120	3.60 ± 1.28	0.03	0.807848	98	1.11 ± 1.33	0.008	0.424	98	7.10 ± 1.39	0.003	0.159
		TA	25	3.85 ± 1.17			21	1.47 ± 1.25			21	7.58 ± 1.31
		AA	3	5.51 ± 0.51			3	3.44 ± 0.51			3	9.72 ± 0.45
	rs1962508
		AA	38	3.89 ± 1.15	0.568	0.822216	30	1.78 ± 0.97	0.626	0.97	30	7.46 ± 1.47	0.612	0.923083
		CA	75	3.63 ± 1.28			63	1.58 ± 0.92			63	7.20 ± 1.42
		CC	35	3.71 ± 1.24			29	1.61 ± 1.00			29	7.11 ± 1.40
	rs2806424
		AA	56	3.80 ± 1.16	0.231	0.807848	43	1.70 ± 0.86	0.237	0.97	43	7.37 ± 1.47	0.201	0.923083
		GA	60	3.81 ± 1.31			49	1.74 ± 1.04			49	7.38 ± 1.43
		GG	32	3.38 ± 1.20			30	1.38 ± 0.89			30	6.84 ± 1.30
	rs6426893
		AA	106	3.66 ± 1.25	0.416	0.807848	86	1.63 ± 0.96	0.578	0.97	86	7.18 ± 1.44	0.348	0.923083
		GA	37	3.92 ± 1.19			31	1.73 ± 0.95			31	7.51 ± 1.33
		GG	5	3.29 ± 1.27			5	1.25 ± 0.68			5	6.64 ± 1.49
	rs919679
		TT	76	3.77 ± 1.25	0.83	0.916458	66	1.66 ± 1.04	0.96	0.97	66	7.31 ± 1.48	0.529	0.923083
		CT	57	3.65 ± 1.17			46	1.61 ± 0.80			46	7.26 ± 1.22
		CC	15	3.64 ± 1.45			10	1.61 ± 1.05			10	6.76 ± 1.91
Dominant model
	rs17609240
		GG	77	3.73 ± 1.19	0.835	0.852041	60	1.66 ± 0.92	0.834	0.930208	60	7.25 ± 1.37	0.965	0.974
		TG+TT	71	3.69 ± 1.29				1.62 ± 0.98				7.24 ± 1.48
	rs9131
		CC	48	3.56 ± 1.36	0.325	0.727778	40	1.53 ± 1.03	0.388	0.794643	40	7.01 ± 1.61	0.213	0.711364
		CT+TT	100	3.78 ± 1.17			82	1.69 ± 0.90			82	7.36 ± 1.31
	rs16850408
		CC	46	3.78 ± 1.15	0.627	0.782143	34	1.73 ± 0.91	0.509	0.848333	34	7.38 ± 1.26	0.505	0.765152
		CA+AA	102	3.68 ± 1.27			88	1.60 ± 0.91			88	7.19 ± 1.48
	rs7686861
		CC	53	3.56 ± 1.30	0.266	0.727778	44	1.51 ± 0.99	0.281	0.794643	44	7.04 ± 1.54	0.24	0.711364
		CT+TT	95	3.80 ± 1.19			78	1.71 ± 0.92			78	7.36 ± 1.34
	rs1371799
		TT	49	3.55 ± 1.34	0.269	0.727778	41	1.52 ± 1.02	0.367	0.794643	41	7.03 ± 1.59	0.251	0.711364
		CT+CC	99	3.79 ± 1.17			81	1.69 ± 0.91			81	7.35 ± 1.32
	rs4065321
		CC	59	3.60 ± 1.51	0.412	0.727778	52	1.67 ± 1.10	0.739	0.921795	52	7.15 ± 1.68	0.572	0.798684
		CT+TT	89	3.79 ± 1.01			70	1.61 ± 0.82			70	7.31 ± 1.19
	rs445
		CC	71	3.58 ± 1.33	0.228	0.727778	63	1.60 ± 0.97	0.669	0.921795	63	7.17 ± 1.51	0.577	0.798684
		CT+TT	77	3.83 ± 1.13			59	1.68 ± 0.93			59	7.32 ± 1.32
	rs4895441
		AA	52	3.81 ± 1.32	0.488	0.727778	46	1.73 ± 1.01	0.404	0.794643	46	7.41 ± 1.42	0.293	0.711364
		GA+GG	96	3.66 ± 1.19			76	1.58 ± 0.91			76	7.14 ± 1.41
	rs4794822
		CC	43	3.92 ± 0.85	0.116	0.727778	34	1.71 ± 0.76	0.618	0.921795	34	7.52 ± 1.10	0.182	0.711364
		CT+TT	105	3.63 ± 1.35			88	1.61 ± 1.01			88	7.13 ± 1.52
	rs2072910
		TT	68	3.64 ± 1.27	0.502	0.727778	55	1.57 ± 0.94	0.44	0.794643	55	7.12 ± 1.44	0.389	0.717241
		CT+CC	80	3.78 ± 1.20			67	1.70 ± 0.95			67	7.35 ± 1.41
	rs1801157
		CC	74	3.67 ± 1.37	0.64	0.782143	61	1.66 ± 1.05	0.796	0.930208	61	7.24 ± 1.56	0.974	0.974
		CT+TT	74	3.76 ± 1.09			61	1.62 ± 0.84			61	7.25 ± 1.28
	rs3894194
		AA	43	3.72 ± 1.24	0.972	0.972	36	1.63 ± 0.93	0.955	0.955	36	7.29 ± 1.40	0.808	0.897778
		GA+GG	105	3.71 ± 1.24			86	1.64 ± 0.96			86	7.22 ± 1.43
	rs3859192
		TT	48	3.61 ± 1.44	0.457	0.727778	41	1.63 ± 1.04	0.934	0.953061	41	7.18 ± 1.70	0.747	0.868605
		CT+CC		3.77 ± 1.13				1.64 ± 0.91				7.28 ± 1.27
	rs12075
		GG	127	3.72 ± 1.23	0.824	0.852041	104	1.64 ± 0.94	0.757	0.930208	104	7.26 ± 1.43	0.733	0.868605
		GA+AA	21	3.66 ± 1.31			18	1.57 ± 1.02			18	7.14 ± 1.42
	rs5020946
		GG	66	3.88 ± 1.23	0.136	0.727778	56	1.79 ± 1.02	0.115	0.794643	56	7.46 ± 1.43	0.12	0.711364
		GT+TT	82	3.58 ± 1.23			66	1.51 ± 0.87			66	7.06 ± 1.40
	rs12660713
		GG	114	3.76 ± 1.24	0.38	0.727778	94	1.70 ± 0.96	0.158	0.794643	94	7.36 ± 1.43	0.098	0.711364
		GA+AA	34	3.55 ± 1.22			28	1.42 ± 0.87			28	6.86 ± 1.35
	rs8065443
		GG+GA	110	3.78 ± 1.12	0.381	0.727778	90	1.65 ± 0.89	0.865	0.930208	90	7.32 ± 1.25	0.414	0.717241
		AA	38	3.54 ± 1.53			32	1.61 ± 1.12			32	7.03 ± 1.82
	rs4657616
		AA	79	3.63 ± 1.22	0.4	0.727778	64	1.52 ± 0.98	0.163	0.794643	64	7.04 ± 1.48	0.095	0.711364
		GA+GG	69	3.81 ± 1.25			58	1.76 ± 0.90			58	7.47 ± 1.33
	rs2183383
		CC	131	3.73 ± 1.24	0.656	0.782143	109	1.66 ± 0.95	0.445	0.794643	109	7.28 ± 1.41	0.485	0.757812
		CT+TT	17	3.59 ± 1.18			13	1.45 ± 0.93			13	6.98 ± 1.55
	rs11121242
		GG	110	3.78 ± 1.23	0.303	0.727778	90	1.68 ± 0.96	0.368	0.794643	90	7.33 ± 1.37	0.281	0.711364
		GA+AA	38	3.54 ± 1.24			32	1.51 ± 0.92			32	7.01 ± 1.55
	rs6577536
		GG	110	3.73 ± 1.25	0.737	0.8375	91	1.66 ± 0.96	0.711	0.921795	91	7.31 ± 1.38	0.368	0.717241
		GA+AA	38	3.66 ± 1.20			31	1.58 ± 0.92			31	7.05 ± 1.53
	rs11590606
		TT	110	3.76 ± 1.26	0.482	0.727778	91	1.68 ± 0.98	0.363	0.794643	91	7.35 ± 1.41	0.177	0.711364
		CT+CC	38	3.59 ± 1.16			31	1.50 ± 0.84			31	6.95 ± 1.44
	rs10864368
		CC	110	3.75 ± 1.26	0.514	0.727778	91	1.68 ± 0.98	0.384	0.794643	91	7.34 ± 1.41	0.199	0.711364
		CT+TT	38	3.60 ± 1.16			31	1.51 ± 0.84			31	6.96 ± 1.44
	rs976760
		TT	40	3.92 ± 1.26	0.218	0.727778	33	1.79 ± 0.96	0.289	0.794643	33	7.48 ± 1.46	0.257	0.711364
		CT+CC	108	3.64 ± 1.22			89	1.58 ± 0.94			89	7.16 ± 1.40
	rs6936204
		CC	105	3.65 ± 1.31	0.358	0.727778	88	1.58 ± 0.95	0.293	0.794643	88	7.13 ± 1.43	0.166	0.711364
		CT+TT	43	3.86 ± 1.03			34	1.78 ± 0.94			34	7.53 ± 1.36
	rs10932765
		CC	56	3.51 ± 1.36	0.121	0.727778	49	1.50 ± 0.99	0.198	0.794643	49	7.08 ± 1.51	0.301	0.711364
		CT+TT	92	3.84 ± 1.14			73	1.73 ± 0.92			73	7.35 ± 1.36
	rs2163950
		CC	104	3.73 ± 1.30	0.826	0.852041	86	1.66 ± 1.00	0.717	0.921795	86	7.26 ± 1.51	0.857	0.931522
		CA+AA	44	3.68 ± 1.09			36	1.59 ± 0.82			36	7.21 ± 1.18
	rs2853946
		AA	117	3.69 ± 1.20	0.692	0.804651	95	1.65 ± 0.96	0.878	0.930208	95	7.23 ± 1.43	0.791	0.897778
		TA+TT	31	3.79 ± 1.36			27	1.61 ± 0.93			27	7.31 ± 1.40
	rs8078723
		TT+CT	106	3.80 ± 1.12	0.263	0.727778	86	1.66 ± 0.90	0.691	0.921795	86	7.33 ± 1.27	0.349	0.717241
		CC	42	3.51 ± 1.48			36	1.59 ± 1.07			36	7.03 ± 1.73
	rs7667376
		CC	53	3.57 ± 1.30	0.29	0.727778	44	1.53 ± 0.99	0.352	0.794643	44	7.05 ± 1.54	0.268	0.711364
		CT+TT	95	3.79 ± 1.19			78	1.70 ± 0.93			78	7.35 ± 1.35
	rs2518564
		AA	71	3.55 ± 1.33	0.117	0.727778	59	1.52 ± 0.98	0.182	0.794643	59	6.99 ± 1.50	0.051	0.711364
		GA+GG	77	3.87 ± 1.13			63	1.75 ± 0.91			63	7.49 ± 1.31
	rs2517524
		AA	67	3.64 ± 1.26	0.524	0.727778	56	1.55 ± 0.99	0.356	0.794643	56	7.13 ± 1.46	0.416	0.717241
		CA+CC	81	3.77 ± 1.21			66	1.71 ± 0.91			66	7.34 ± 1.39
	rs1041163
		TT	94	3.80 ± 1.30	0.243	0.727778	79	1.72 ± 0.98	0.201	0.794643	79	7.36 ± 1.51	0.213	0.711364
		CT+CC	54	3.56 ± 1.11			43	1.49 ± 0.87			43	7.03 ± 1.23
	rs13347
		CC	68	3.64 ± 1.26	0.498	0.727778	58	1.60 ± 0.88	0.67	0.921795	58	7.20 ± 1.40	0.744	0.868605
		CT+TT	80	3.78 ± 1.22			64	1.67 ± 1.01			64	7.28 ± 1.44
	rs546829
		AA+TA	109	3.66 ± 1.23	0.331	0.727778	94	1.60 ± 0.95	0.396	0.794643	94	7.17 ± 1.43	0.301	0.711364
		TT	39	3.88 ± 1.25			28	1.77 ± 0.95			28	7.49 ± 1.37
	rs2844503
		TT	56	3.68 ± 1.17	0.819	0.852041	47	1.65 ± 0.86	0.845	0.930208	47	7.32 ± 1.32	0.639	0.819231
		TA+AA	92	3.73 ± 1.28			75	1.63 ± 1.00			75	7.19 ± 1.48
	rs579459
		TT	74	3.67 ± 1.26	0.648	0.782143	59	1.60 ± 0.95	0.704	0.921795	59	7.26 ± 1.50	0.932	0.970833
		CT+CC	74	3.76 ± 1.21			63	1.67 ± 0.96			63	7.23 ± 1.35
	rs6702883
		AA	100	3.77 ± 1.25	0.403	0.727778	83	1.71 ± 0.98	0.22	0.794643	83	7.32 ± 1.45	0.416	0.717241
		GA+GG	48	3.59 ± 1.20			39	1.48 ± 0.86			39	7.09 ± 1.37
	rs4311917
		AA	100	3.85 ± 1.16	0.051	0.727778	85	1.72 ± 0.94	0.134	0.794643	85	7.39 ± 1.38	0.078	0.711364
		CA+CC	48	3.43 ± 1.35			37	1.44 ± 0.95			37	6.90 ± 1.47
	rs345275
		AA	92	3.75 ± 1.09	0.657	0.782143	73	1.58 ± 0.85	0.443	0.794643	73	7.19 ± 1.23	0.598	0.798684
		TA+TT	56	3.65 ± 1.45			49	1.72 ± 1.08			49	7.33 ± 1.67
	rs2365669
		GG	75	3.74 ± 1.33	0.781	0.852041	61	1.74 ± 1.04	0.242	0.794643	61	7.26 ± 1.59	0.923	0.970833
		GA+AA	73	3.69 ± 1.13			61	1.54 ± 0.84			61	7.23 ± 1.24
	rs7523839
		TT	85	3.83 ± 1.12	0.181	0.727778	71	1.73 ± 0.93	0.206	0.794643	71	7.35 ± 1.38	0.313	0.711364
		TG+GG	63	3.56 ± 1.37			51	1.51 ± 0.97			51	7.09 ± 1.48
	rs850610
		GG	81	3.85 ± 1.26	0.149	0.727778	65	1.70 ± 1.00	0.472	0.813793	65	7.31 ± 1.44	0.607	0.798684
		GA+AA	67	3.55 ± 1.19			57	1.57 ± 0.89			57	7.17 ± 1.40
	rs11240089
		TT	71	3.56 ± 1.03	0.134	0.727778	56	1.49 ± 0.77	0.109	0.794643	56	6.98 ± 1.21	0.06	0.711364
		CT+CC	77	3.86 ± 1.39			66	1.76 ± 1.06			66	7.47 ± 1.55
	rs12740969
		GG	102	3.76 ± 1.24	0.521	0.727778	84	1.65 ± 0.95	0.893	0.930208	84	7.21 ± 1.42	0.672	0.84
		TG+TT	46	3.62 ± 1.24			38	1.62 ± 0.96			38	7.33 ± 1.44
	rs11264422
		TT	120	3.60 ± 1.28	0.1	0.727778	98	1.11 ± 1.33	0.05	0.794643	98	7.10 ± 1.39	0.02	0.711364
		TA+AA	28	4.02 ± 1.23			24	1.71 ± 1.35			24	7.84 ± 1.43
	rs1962508
		AA	38	3.89 ± 1.15	0.307	0.727778	30	1.78 ± 0.97	0.335	0.794643	30	7.46 ± 1.47	0.341	0.717241
		CA+CC	110	3.65 ± 1.26			92	1.59 ± 0.94			92	7.17 ± 1.41
	rs2806424
		AA	56	3.80 ± 1.16	0.507	0.727778	43	1.70 ± 0.86	0.575	0.921795	43	7.37 ± 1.47	0.483	0.757812
		GA+GG	92	3.66 ± 1.28			79	1.60 ± 1.00			79	7.18 ± 1.40
	rs6426893
		AA	106	3.66 ± 1.25	0.425	0.727778	86	1.63 ± 0.96	0.858	0.930208	86	7.18 ± 1.44	0.477	0.757812
		GA+GG	42	3.84 ± 1.20			36	1.66 ± 0.93			36	7.39 ± 1.37
	rs919679
		TT	76	3.77 ± 1.25	0.542	0.732432	66	1.66 ± 1.04	0.773	0.930208	66	7.31 ± 1.48	0.6	0.798684
		CT+CC	72	3.65 ± 1.22			56	1.61 ± 0.84			56	7.17 ± 1.36
Recessive model
	rs17609240
		GG+TG	137	3.72 ± 1.22	0.884	0.923958	113	1.63 ± 0.93	0.844	0.993	113	7.25 ± 1.39	0.888	0.934375
		TT	11	3.66 ± 1.42			9	1.69 ± 1.25			9	7.18 ± 1.84
	rs9131
		CC+CT	131	3.67 ± 1.24	0.247	0.741667	109	1.60 ± 0.95	0.161	0.695833	109	7.17 ± 1.43	0.08	0.66
		TT	17	4.04 ± 1.17			13	1.98 ± 0.92			13	7.89 ± 1.22
	rs16850408
		CC+CA	126	3.65 ± 1.27	0.146	0.608333	104	1.61 ± 0.93	0.367	0.993	104	7.19 ± 1.42	0.347	0.724
		AA	22	4.06 ± 0.97			18	1.82 ± 1.04			18	7.53 ± 1.43
	rs7686861
		CC+CT	130	3.68 ± 1.26	0.359	0.854762	109	1.61 ± 0.97	0.417	0.993	109	7.19 ± 1.45	0.258	0.66
		TT	18	3.96 ± 1.02			13	1.84 ± 0.76			13	7.66 ± 1.03
	rs1371799
		TT+CT	130	3.65 ± 1.23	0.108	0.6	108	1.59 ± 0.94	0.126	0.655	108	7.16 ± 1.43	0.084	0.66
		CC	18	4.15 ± 1.22			14	2.00 ± 0.95			14	7.86 ± 1.23
	rs4065321
		CC+CT	118	3.65 ± 1.32	0.086	0.54375	99	1.63 ± 0.98	0.782	0.993	99	7.17 ± 1.47	0.208	0.66
		TT	30	3.97 ± 0.79			23	1.68 ± 0.82			23	7.58 ± 1.14
	rs445
		CC+CT	117	3.69 ± 1.23	0.595	0.923958	95	1.63 ± 0.95	0.786	0.993	95	7.22 ± 1.43	0.731	0.934375
		TT	31	3.81 ± 1.27			27	1.68 ± 0.94			27	7.32 ± 1.41
	rs4895441
		AA+GA	123	3.76 ± 1.28	0.297	0.781579	104	1.69 ± 0.98	0.167	0.695833	104	7.31 ± 1.46	0.246	0.66
		GG	25	3.48 ± 0.99			18	1.35 ± 0.67			18	6.88 ± 1.10
	rs4794822
		CC+CT	107	3.80 ± 1.11	0.253	0.741667	86	1.66 ± 0.90	0.691	0.993	86	7.33 ± 1.27	0.349	0.724
		TT	41	3.50 ± 1.50			36	1.59 ± 1.07			36	7.03 ± 1.73
	rs2072910
		TT+CT	137	3.71 ± 1.27	0.661	0.923958	112	1.64 ± 0.98	0.882	0.993	112	7.22 ± 1.46	0.258	0.66
		CC	11	3.80 ± 0.59			10	1.61 ± 0.56			10	7.56 ± 0.82
	rs1801157
		CC+CT	133	3.73 ± 1.23	0.636	0.923958	107	1.64 ± 0.95	0.933	0.993	107	7.27 ± 1.42	0.555	0.919355
		TT	15	3.57 ± 1.26			15	1.62 ± 0.93			15	7.04 ± 1.48
	rs3894194
		AA+GA	123	3.69 ± 1.22	0.548	0.923958	103	1.61 ± 0.91	0.429	0.993	103	7.22 ± 1.39	0.618	0.934375
		GG	25	3.85 ± 1.33			19	1.79 ± 1.16			19	7.39 ± 1.63
	rs3859192
		TT+CT	112	3.65 ± 1.33	0.141	0.608333	91	1.60 ± 1.00	0.405	0.993	91	7.14 ± 1.50	0.147	0.66
		CC	36	3.93 ± 0.85			31	1.76 ± 0.76			31	7.56 ± 1.11
	rs12075
		GG+GA	146	3.69 ± 1.22	0.087	0.54375	120	1.62 ± 0.94	0.089	0.642857	120	7.22 ± 1.41	0.149	0.66
		AA	2	5.20 ± 1.53			2	2.77 ± 1.37			2	8.69 ± 1.83
	rs5020946
		GG+GT	101	3.70 ± 1.24	0.808	0.923958	85	1.64 ± 0.94	0.993	0.993	85	7.21 ± 1.42	0.698	0.934375
		TT	47	3.75 ± 1.24			37	1.64 ± 0.97			37	7.32 ± 1.43
	rs12660713
		GG+GA	147	3.73 ± 1.22	0.03	0.54375	121	1.65 ± 0.94	0.131	0.655	121	7.27 ± 1.41	0.072	0.66
		AA	1	1.1 ±			1	0.2 ±			1	4.7 ±
	rs8065443
		GG	37	3.94 ± 0.89	0.127	0.608333	28	1.74 ± 0.81	0.539	0.993	28	7.51 ± 1.17	0.252	0.66
		GA+AA	111	3.64 ± 1.32			94	1.61 ± 0.99			94	7.16 ± 1.48
	rs4657616
		AA+GA	132	3.69 ± 1.26	0.459	0.923958	110	1.62 ± 0.96	0.565	0.993	110	7.22 ± 1.44	0.519	0.919355
		GG	16	3.93 ± 1.04			12	1.79 ± 0.87			12	7.50 ± 1.20
	rs2183383
		CC+CT	146	3.71 ± 1.24	0.671	0.923958	120	1.63 ± 0.95	0.5	0.993	120	7.23 ± 1.41	0.538	0.919355
		TT	2	4.08 ± 1.47			2	2.19 ± 1.43			2	7.86 ± 2.67
	rs11121242
		GG+GA	146	3.72 ± 1.24	0.663	0.923958	121	1.64 ± 0.95	0.769	0.993	121	7.24 ± 1.43	0.986	0.986
		AA	2	3.34 ± 0.05			1	1.36 ±			1	7.27 ±
	rs6577536
		GG+GA	145	3.72 ± 1.25	0.887	0.923958	120	1.64 ± 0.96	0.992	0.993	120	7.25 ± 1.43	0.854	0.934375
		AA	3	3.61 ± 0.48			2	1.65 ± 0.40			2	7.06 ± 0.30
	rs11590606
		TT+CT	145	3.72 ± 1.25	0.887	0.923958	120	1.64 ± 0.96	0.992	0.993	120	7.25 ± 1.43	0.854	0.934375
		CC	3	3.61 ± 0.48			2	1.65 ± 0.40			2	7.06 ± 0.30
	rs10864368
		CC+CT	145	3.72 ± 1.25	0.887	0.923958	120	1.64 ± 0.96	0.992	0.993	120	7.25 ± 1.43	0.854	0.934375
		TT	3	3.61 ± 0.48			2	1.65 ± 0.40			2	7.06 ± 0.30
	rs976760
		TT+CT	108	3.69 ± 1.31	0.719	0.923958	89	1.63 ± 1.00	0.914	0.993	89	7.21 ± 1.51	0.706	0.934375
		CC	40	3.77 ± 1.01			33	1.65 ± 0.80			33	7.32 ± 1.15
	rs6936204
		CC+CT	135	3.69 ± 1.28	0.051	0.54375	114	1.62 ± 0.98	0.057	0.642857	114	7.23 ± 1.46	0.457	0.846296
		TT	13	4.01 ± 0.42			8	1.88 ± 0.27			8	7.42 ± 0.58
	rs10932765
		CC+CT	119	3.69 ± 1.31	0.565	0.923958	100	1.62 ± 0.99	0.65	0.993	100	7.19 ± 1.48	0.362	0.724
		TT	29	3.83 ± 0.85			22	1.72 ± 0.72			22	7.50 ± 1.07
	rs2163950
		CC+CA	143	3.71 ± 1.25	0.849	0.923958	118	1.64 ± 0.96	0.126	0.655	118	7.24 ± 1.44	0.816	0.934375
		AA	5	3.82 ± 0.51			4	1.46 ± 0.14			4	7.41 ± 0.31
	rs2853946
		AA+TA	144	3.69 ± 1.24	0.247	0.741667	118	1.62 ± 0.96	0.289	0.993	118	7.21 ± 1.43	0.137	0.66
		TT	4	4.42 ± 0.49			4	2.14 ± 0.46			4	8.29 ± 0.45
	rs8078723
		TT	41	3.90 ± 0.86	0.175	0.653571	32	1.69 ± 0.78	0.742	0.993	32	7.48 ± 1.12	0.282	0.671429
		CT+CC	107	3.64 ± 1.35			90	1.62 ± 1.01			90	7.16 ± 1.51
	rs7667376
		CC+CT	130	3.68 ± 1.26	0.359	0.854762	109	1.61 ± 0.97	0.417	0.993	109	7.19 ± 1.45	0.258	0.66
		TT	18	3.97 ± 1.03			13	1.84 ± 0.76			13	7.67 ± 1.04
	rs2518564
		AA+GA	141	3.72 ± 1.25	0.817	0.923958	117	1.65 ± 0.96	0.437	0.993	117	7.26 ± 1.43	0.666	0.934375
		GG	7	3.61 ± 1.02			5	1.31 ± 0.76			5	6.97 ± 1.11
	rs2517524
		AA+CA	128	3.67 ± 1.24	0.267	0.741667	104	1.61 ± 0.96	0.386	0.993	104	7.18 ± 1.44	0.2	0.66
		CC	20	4.00 ± 1.17			18	1.82 ± 0.88			18	7.64 ± 1.29
	rs1041163
		TT+CT	146	3.72 ± 1.23	0.59	0.923958	120	1.64 ± 0.95	0.761	0.993	120	7.25 ± 1.42	0.858	0.934375
		CC	2	3.25 ± 1.83			2	1.44 ± 0.42			2	7.07 ± 2.20
	rs13347
		CC+CT	133	3.73 ± 1.24	0.681	0.923958	108	1.66 ± 0.94	0.497	0.993	108	7.27 ± 1.42	0.653	0.934375
		TT	15	3.59 ± 1.22			14	1.48 ± 1.03			14	7.08 ± 1.42
	rs546829
		AA	32	3.78 ± 1.15	0.729	0.923958	26	1.63 ± 0.99	0.964	0.993	26	7.29 ± 1.43	0.859	0.934375
		TA+TT	116	3.70 ± 1.26			96	1.64 ± 0.94			96	7.23 ± 1.42
	rs2844503
		TT+TA	123	3.71 ± 1.19	0.997	0.997	99	1.63 ± 0.94	0.846	0.993	23	7.25 ± 1.38	0.897	0.934375
		AA	25	3.72 ± 1.46			23	1.67 ± 1.01			23	7.21 ± 1.60
	rs579459
		TT+CT	136	3.69 ± 1.19	0.435	0.923958	112	1.61 ± 0.91	0.516	0.993	112	7.21 ± 1.40	0.444	0.846296
		CC	12	3.98 ± 1.70			10	1.91 ± 1.35			10	7.58 ± 1.70
	rs6702883
		AA+GA	143	3.68 ± 1.24	0.085	0.54375	119	1.62 ± 0.94	0.087	0.642857	119	7.22 ± 1.42	0.189	0.66
		GG	5	4.65 ± 0.72			3	2.56 ± 0.79			3	8.31 ± 1.35
	rs4311917
		AA+CA	144	3.70 ± 1.24	0.466	0.923958	119	1.62 ± 0.94	0.281	0.993	119	7.21 ± 1.42	0.148	0.66
		CC	4	4.16 ± 0.99			3	2.22 ± 1.20			3	8.42 ± 1.28
	rs345275
		AA+TA	139	3.73 ± 1.17	0.756	0.923958	115	1.63 ± 0.90	0.843	0.993	115	7.26 ± 1.33	0.816	0.934375
		TT	9	3.51 ± 2.04			7	1.76 ± 1.64			7	7.01 ± 2.67
	rs2365669
		GG+GA	132	3.73 ± 1.23	0.619	0.923958	108	1.66 ± 0.95	0.567	0.993	108	7.25 ± 1.41	0.86	0.934375
		AA	16	3.57 ± 1.34			14	1.50 ± 0.98			14	7.18 ± 1.52
	rs7523839
		TT+TG	144	3.72 ± 1.25	0.769	0.923958	119	1.64 ± 0.96	0.724	0.993	119	7.25 ± 1.43	0.658	0.934375
		GG	4	3.54 ± 0.54			3	1.45 ± 0.55			3	6.88 ± 0.51
	rs850610
		GG+GA	137	3.70 ± 1.26	0.74	0.923958	112	1.64 ± 0.97	0.818	0.993	112	7.24 ± 1.45	0.953	0.972449
		AA	11	3.83 ± 0.85			10	1.57 ± 0.70			10	7.27 ± 1.15
	rs11240089
		TT+CT	130	3.64 ± 1.24	0.045	0.54375	108	1.58 ± 0.92	0.058	0.642857	108	7.15 ± 1.40	0.033	0.66
		CC	18	4.26 ± 1.08			14	2.09 ± 1.10			14	8.00 ± 1.35
	rs12740969
		GG+TG	146	3.70 ± 1.22	0.183	0.653571	121	1.62 ± 0.94	0.07	0.642857	121	7.23 ± 1.41	0.114	0.66
		TT	2	4.87 ± 1.90			1	3.35 ±			1	9.48 ±
	rs11264422
		TT+TA	145	3.55 ± 1.41	0.01	0.5	119	1.20 ± 1.35	0.008	0.4	119	7.25 ± 1.42	0.003	0.15
		AA	3	5.51 ± 0.51			3	3.44 ± 0.51			3	9.72 ± 0.45
	rs1962508
		AA+CA	113	3.72 ± 1.24	0.964	0.983673	93	1.64 ± 0.94	0.834	0.993	93	7.29 ± 1.43	0.57	0.919355
		CC	35	3.71 ± 1.24			29	1.61 ± 1.00			29	7.11 ± 1.40
	rs2806424
		AA+GA	116	3.81 ± 1.23	0.086	0.54375	92	1.72 ± 0.96	0.09	0.642857	92	7.38 ± 1.44	0.073	0.66
		GG	32	3.38 ± 1.20			30	1.38 ± 0.89			30	6.84 ± 1.30
	rs6426893
		AA+GA	143	3.73 ± 1.23	0.44	0.923958	117	1.66 ± 0.96	0.357	0.993	117	7.27 ± 1.42	0.331	0.724
		GG	5	3.29 ± 1.27			5	1.25 ± 0.68			5	6.64 ± 1.49
	rs919679
		TT+CT	133	3.72 ± 1.21	0.798	0.923958	112	1.64 ± 0.94	0.927	0.993	112	7.29 ± 1.37	0.264	0.66
		CC	15	3.64 ± 1.45			10	1.61 ± 1.05			10	6.76 ± 1.91
Additive model
	rs17609240
		GG+TT	88	3.73 ± 1.21	0.893	0.995	69	1.66 ± 0.96	0.753	0.946591	69	7.24 ± 1.42	0.752	0.946
		TG	60	3.69 ± 1.27			53	1.61 ± 0.94			53	7.25 ± 1.43
	rs9131
		CC+TT	65	3.69 ± 1.32	0.854	0.995	53	1.64 ± 1.63	0.958	0.958	53	7.23 ± 1.56	0.924	0.986
		CT	83	3.73 ± 1.16			69	1.63 ± 0.89			69	7.25 ± 1.31
	rs16850408
		CC+AA	68	3.88 ± 1.10	0.136	0.995	52	1.76 ± 0.95	0.212	0.9375	52	7.44 ± 1.31	0.2	0.88
		CA	80	3.57 ± 1.32			70	1.54 ± 0.94			70	7.10 ± 1.48
	rs7686861
		CC+TT	71	3.66 ± 1.25	0.641	0.995	57	1.59 ± 0.95	0.593	0.9375	57	7.19 ± 1.46	0.668	0.946
		CT	77	3.75 ± 1.22			65	1.68 ± 0.95			65	7.29 ± 1.39
	rs1371799
		TT+CC	67	3.71 ± 1.33	0.995	0.995	55	1.65 ± 1.02	0.905	0.958	55	7.25 ± 1.54	0.989	0.989
		CT	81	3.71 ± 1.15			67	1.62 ± 0.89			67	7.24 ± 1.32
	rs4065321
		CC+TT	89	3.73 ± 1.32	0.86	0.995	75	1.68 ± 1.02	0.564	0.9375	75	7.29 ± 1.55	0.686	0.946
		CT	59	3.69 ± 1.10			47	1.57 ± 0.83			47	7.17 ± 1.20
	rs445
		CC+TT	102	3.66 ± 1.32	0.358	0.995	90	1.63 ± 0.96	0.818	0.946591	90	7.22 ± 1.48	0.757	0.946
		CT	46	3.84 ± 1.03			32	1.67 ± 0.92			32	7.31 ± 1.24
	rs4895441
		AA+GG	77	3.70 ± 1.22	0.905	0.995	64	1.62 ± 0.94	0.866	0.958	64	7.27 ± 1.36	0.845	0.983
		GA	71	3.73 ± 1.25			58	1.65 ± 0.96			58	7.21 ± 1.49
	rs4794822
		CC+TT	84	3.72 ± 1.22	0.987	0.995	70	1.65 ± 0.93	0.932	0.958	70	7.27 ± 1.47	0.823	0.98
		CT	64	3.71 ± 1.26			52	1.63 ± 0.99			52	7.21 ± 1.36
	rs2072910
		TT+CC	79	3.66 ± 1.20	0.586	0.995	65	1.57 ± 0.89	0.411	0.9375	65	7.19 ± 1.36	0.649	0.946
		CT	69	3.77 ± 1.28			57	1.71 ± 1.01			57	7.31 ± 1.49
	rs1801157
		CC+TT	89	3.65 ± 1.35	0.442	0.995	76	1.65 ± 1.02	0.833	0.946591	76	7.20 ± 1.54	0.665	0.946
		CT	59	3.81 ± 1.04			46	1.61 ± 0.82			46	7.31 ± 1.21
	rs3894194
		AA+GG	68	3.77 ± 1.26	0.629	0.995	55	1.69 ± 1.01	0.6	0.9375	55	7.33 ± 1.47	0.558	0.946
		GA	80	3.67 ± 1.21			67	1.59 ± 0.89			67	7.17 ± 1.39
	rs3859192
		TT+CC	84	3.74 ± 1.22	0.746	0.995	72	1.69 ± 0.92	0.511	0.9375	72	7.35 ± 1.48	0.348	0.88
		CT	64	3.67 ± 1.25			50	1.57 ± 0.98			50	7.10 ± 1.34
	rs12075
		GG+AA	129	3.75 ± 1.24	0.412	0.995	106	1.67 ± 0.95	0.336	0.9375	106	7.29 ± 1.44	0.368	0.88
		GA	19	3.50 ± 1.22			16	1.42 ± 0.92			16	6.94 ± 1.30
	rs5020946
		GG+TT	113	3.83 ± 1.23	0.044	0.995	93	1.73 ± 1.00	0.063	0.9375	93	7.41 ± 1.42	0.024	0.55
		GT	35	3.35 ± 1.19			29	1.35 ± 0.70			29	6.73 ± 1.31
	rs12660713
		GG+AA	115	3.74 ± 1.26	0.638	0.995	95	1.69 ± 0.97	0.271	0.9375	95	7.33 ± 1.44	0.2	0.88
		GA	33	3.62 ± 1.15			27	1.46 ± 0.85			27	6.93 ± 1.30
	rs8065443
		GG+AA	75	3.73 ± 1.27	0.838	0.995	60	1.67 ± 0.98	0.714	0.946591	60	7.26 ± 1.56	0.92	0.986
		GA	73	3.69 ± 1.21			62	1.61 ± 0.93			62	7.23 ± 1.28
	rs4657616
		AA+GG	95	3.68 ± 1.19	0.692	0.995	76	1.57 ± 0.96	0.279	0.9375	76	7.11 ± 1.44	0.188	0.88
		GA	53	3.77 ± 1.31			46	1.76 ± 0.92			46	7.46 ± 1.37
	rs2183383
		CC+TT	133	3.74 ± 1.24	0.528	0.995	111	1.67 ± 0.95	0.261	0.9375	111	7.29 ± 1.42	0.305	0.88
		CT	15	3.52 ± 1.19			11	1.33 ± 0.86			11	6.82 ± 1.41
	rs11121242
		GG+AA	112	3.77 ± 1.22	0.352	0.995	91	1.68 ± 0.95	0.396	0.9375	91	7.33 ± 1.36	0.275	0.88
		GA	36	3.55 ± 1.27			31	1.51 ± 0.94			31	7.00 ± 1.57
	rs6577536
		GG+AA	113	3.73 ± 1.24	0.766	0.995	93	1.66 ± 0.95	0.703	0.946591	93	7.31 ± 1.37	0.387	0.88
		GA	35	3.66 ± 1.24			29	1.58 ± 0.95			29	7.04 ± 1.59
	rs11590606
		TT+CC	113	3.75 ± 1.24	0.499	0.995	93	1.68 ± 0.97	0.351	0.9375	93	7.34 ± 1.39	0.185	0.88
		CT	35	3.59 ± 1.21			29	1.49 ± 0.87			29	6.94 ± 1.49
	rs10864368
		CC+TT	113	3.75 ± 1.25	0.532	0.995	93	1.68 ± 0.97	0.372	0.9375	93	7.33 ± 1.39	0.209	0.88
		CT	35	3.60 ± 1.20			29	1.50 ± 0.86			29	6.95 ± 1.49
	rs976760
		TT+CC	80	3.85 ± 1.14	0.155	0.995	66	1.72 ± 0.88	0.297	0.9375	66	7.40 ± 1.30	0.177	0.88
		CT	68	3.56 ± 1.33			56	1.54 ± 1.02			56	7.06 ± 1.54
	rs6936204
		CC+TT	118	3.69 ± 1.24	0.682	0.995	96	1.61 ± 0.92	0.487	0.9375	96	7.16 ± 1.38	0.195	0.88
		CT	30	3.80 ± 1.21			26	1.75 ± 1.07			26	7.57 ± 1.53
	rs10932765
		CC+TT	85	3.62 ± 1.22	0.291	0.995	71	1.57 ± 0.91	0.357	0.9375	71	7.21 ± 1.39	0.752	0.946
		CT	63	3.84 ± 1.26			51	1.73 ± 1.00			51	7.29 ± 1.47
	rs2163950
		CC+AA	109	3.73 ± 1.27	0.759	0.995	90	1.65 ± 0.98	0.823	0.946591	90	7.27 ± 1.48	0.779	0.95
		CA	39	3.66 ± 1.14			32	1.61 ± 0.87			32	7.18 ± 1.25
	rs2853946
		AA+TT	121	3.72 ± 1.19	0.946	0.995	99	1.67 ± 0.95	0.519	0.9375	99	7.27 ± 1.42	0.694	0.946
		TA	27	3.70 ± 1.42			23	1.52 ± 0.97			23	7.14 ± 1.44
	rs8078723
		TT+CC	83	3.70 ± 1.22	0.892	0.995	68	1.63 ± 0.94	0.941	0.958	68	7.24 ± 1.48	0.978	0.989
		CT	65	3.73 ± 1.26			54	1.65 ± 0.97			54	7.25 ± 1.35
	rs7667376
		CC+TT	71	3.67 ± 1.24	0.679	0.995	57	1.60 ± 0.95	0.695	0.946591	57	7.19 ± 1.45	0.715	0.946
		CT	77	3.75 ± 1.23			65	1.67 ± 0.96			65	7.29 ± 1.40
	rs2518564
		AA+GG	78	3.55 ± 1.30	0.095	0.995	64	1.50 ± 0.96	0.099	0.9375	64	6.98 ± 1.46	0.033	0.55
		GA	70	3.89 ± 1.14			58	1.79 ± 0.92			58	7.53 ± 1.32
	rs2517524
		AA+CC	87	3.72 ± 1.24	0.9	0.995	74	1.62 ± 0.97	0.755	0.946591	74	7.25 ± 1.43	0.413	0.89
		CA	61	3.70 ± 1.23			48	1.67 ± 0.93			48	7.23 ± 1.42
	rs1041163
		TT+CC	96	3.79 ± 1.30	0.295	0.995	81	1.71 ± 0.99	0.226	0.9375	81	7.36 ± 1.51	0.225	0.88
		CT	52	3.57 ± 1.10			41	1.49 ± 0.86			41	7.02 ± 1.21
	rs13347
		CC+TT	83	3.63 ± 1.24	0.352	0.995	72	1.58 ± 0.91	0.383	0.9375	72	7.18 ± 1.40	0.534	0.946
		CT	65	3.82 ± 1.22			50	1.73 ± 1.01			50	7.34 ± 1.46
	rs546829
		AA+TT	71	3.84 ± 1.20	0.253	0.995	54	1.70 ± 0.96	0.495	0.9375	54	7.39 ± 1.39	0.306	0.88
		TA	77	3.60 ± 1.26			68	1.59 ± 0.94			68	7.13 ± 1.44
	rs2844503
		TT+AA	81	3.69 ± 1.26	0.826	0.995	70	1.66 ± 0.91	0.824	0.946591	70	7.28 ± 1.41	0.719	0.946
		TA	67	3.74 ± 1.21			52	1.62 ± 1.01			52	7.19 ± 1.45
	rs579459
		TT+CC	86	3.71 ± 1.32	0.975	0.995	69	1.65 ± 1.00	0.896	0.958	69	7.30 ± 1.52	0.611	0.946
		CT	62	3.72 ± 1.11			53	1.63 ± 0.87			53	7.17 ± 1.28
	rs6702883
		AA+GG	105	3.82 ± 1.24	0.121	0.995	86	1.74 ± 0.99	0.066	0.9375	86	7.35 ± 1.45	0.201	0.88
		GA	43	3.47 ± 1.19			36	1.39 ± 0.81			36	6.99 ± 1.34
	rs4311917
		AA+CC	104	3.86 ± 1.15	0.023	0.995	88	1.74 ± 0.95	0.056	0.9375	88	7.43 ± 1.38	0.02	0.55
		CA	44	3.36 ± 1.36			34	1.37 ± 0.91			34	6.77 ± 1.43
	rs345275
		AA+TT	101	3.73 ± 1.19	0.818	0.995	80	1.60 ± 0.93	0.51	0.9375	80	7.17 ± 1.39	0.427	0.89
		TA	47	3.68 ± 1.34			42	1.72 ± 0.98			42	7.39 ± 1.48
	rs2365669
		GG+AA	91	3.71 ± 1.32	0.975	0.995	75	1.70 ± 1.03	0.408	0.9375	75	7.24 ± 1.56	0.987	0.989
		GA	57	3.72 ± 1.08			47	1.55 ± 0.81			47	7.25 ± 1.17
	rs7523839
		TT+GG	89	3.82 ± 1.10	0.233	0.995	74	1.72 ± 0.91	0.245	0.9375	74	7.34 ± 1.35	0.381	0.88
		TG	59	3.56 ± 1.41			48	1.51 ± 0.99			48	7.10 ± 1.52
	rs850610
		GG+AA	92	3.85 ± 1.21	0.097	0.995	75	1.68 ± 0.96	0.543	0.9375	75	7.30 ± 1.40	0.575	0.946
		GA	56	3.50 ± 1.25			47	1.57 ± 0.93			47	7.15 ± 1.46
	rs11240089
		TT+CC	89	3.70 ± 1.07	0.871	0.995	70	1.61 ± 0.88	0.724	0.946591	70	7.19 ± 1.30	0.602	0.946
		CT	59	3.74 ± 1.46			52	1.67 ± 1.05			52	7.32 ± 1.58
	rs12740969
		GG+TT	104	3.78 ± 1.25	0.324	0.995	85	1.67 ± 0.96	0.625	0.946591	85	7.23 ± 1.43	0.906	0.986
		TG	44	3.56 ± 1.20			37	1.57 ± 0.93			37	7.27 ± 1.41
	rs11264422
		TT+AA	123	3.65 ± 1.33	0.5	0.995	101	1.23 ± 1.37	0.4	0.9375	101	7.22 ± 1.44	0.3	0.88
		TA	25	3.84 ± 1.17			21	1.47 ± 1.25			21	7.57 ± 1.31
	rs1962508
		AA+CC	73	3.80 ± 1.19	0.393	0.995	59	1.70 ± 0.98	0.514	0.9375	59	7.29 ± 1.43	0.737	0.946
		CA	75	3.63 ± 1.28			63	1.58 ± 0.92			63	7.20 ± 1.42
	rs2806424
		AA+GG	88	3.65 ± 1.18	0.438	0.995	73	1.57 ± 0.88	0.35	0.9375	73	7.15 ± 1.42	0.377	0.88
		GA	60	3.81 ± 1.31			49	1.74 ± 1.04			49	7.38 ± 1.43
	rs6426893
		AA+GG	111	3.65 ± 1.25	0.248	0.995	91	1.61 ± 0.95	0.544	0.9375	91	7.15 ± 1.44	0.234	0.88
		GA	37	3.92 ± 1.19			31	1.73 ± 0.95			31	7.51 ± 1.33
	rs919679
		TT+CC	91	3.75 ± 1.28	0.64	0.995	76	1.66 ± 1.03	0.807	0.946591	76	7.24 ± 1.54	0.927	0.986
		CT	57	3.65 ± 1.17			46	1.61 ± 0.80			46	7.26 ± 1.22
PB, peripheral blood; SD, standard deviation; FDR, adjusted P value using false discovery rate controlling procedure
aNatural log transformation was applied to mobilization outcomes due to skewed distribution.
